# Supplementary material
Source: Springer Nature journal article supplement (https://www.springermedizin.de/resource/supplementary/12889_2012_4126_MOESM2_ESM.pdf/9491562)
Supplement: MOESM2 [file 9491562]

0 months

- Baseline - randomization
- CV risk profiling and Quality of Life questionnaires

6 months

- Follow up
- CV risk profiling and Quality of Life questionnaires

12 months

- Follow up
- CV risk profiling and Quality of Life questionnaires
